# Supplementary material for: Senescence associated long non-coding RNA 1 regulates cigarette smoke-induced senescence of type II alveolar epithelial cells through sirtuin-1 signaling
Source: PubMed Central journal article supplement — J Int Med Res. 2021 Feb 4;49(2):0300060520986049. doi: 10.1177/0300060520986049 (PMC7869169; doi:10.1177/0300060520986049), 2021-02-04
Supplement: sj-pdf-2-imr-10.1177_0300060520986049.pdf [file sj-pdf-2-imr-10.1177_0300060520986049.pdf]

deals with lncRNA-mediated SIRT1 signaling pathways that play an essential role in lung cell senescence. Authors have utilized primary human alveolar epithelial cells in culture along with cigarette smoke-DMEM suspension (CSM) to demonstrate the involvement of lncRNA-SAL1 in AECII cell senescence through SIRT1-dependent mechanism. SIRT1 activation by SRT2104 and overexpression of senescence-associated lncRNA1 (SAL-RNA1) attenuates CSM-induced cellular senescence possibly via SIRT1-FOXO3a and p53 dependent signaling
