# Supplementary figures and images for: Senescence associated long non-coding RNA 1 regulates cigarette smoke-induced senescence of type II alveolar epithelial cells through sirtuin-1 signaling
Source: PubMed Central journal article supplement — J Int Med Res. 2021 Feb 4;49(2):0300060520986049. doi: 10.1177/0300060520986049 (PMC7869169; doi:10.1177/0300060520986049), 2021-02-04

Mock

SAL-NC

SAL-RNA1

Phase contrast

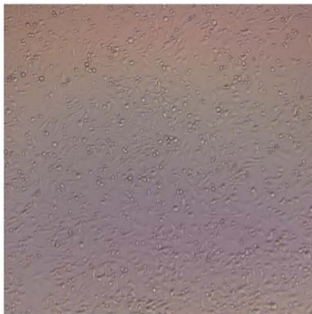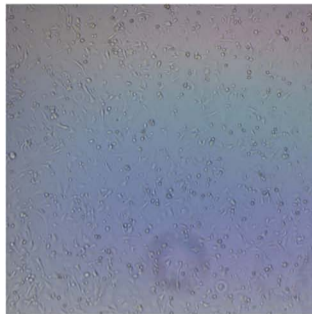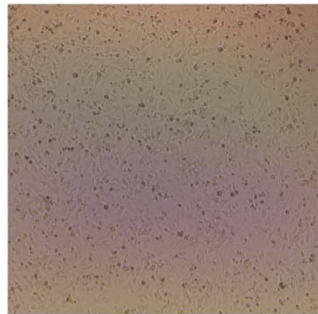

GFP

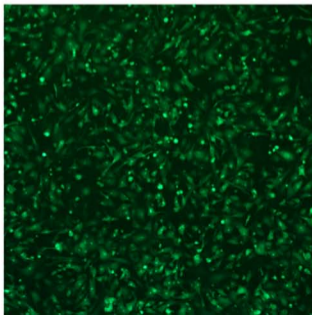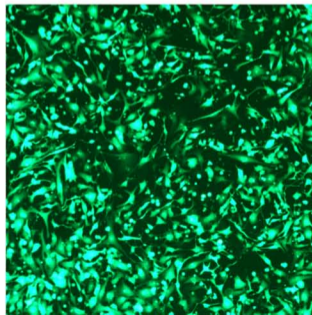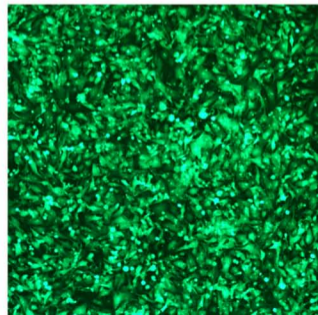

Supplement: sj-pdf-1-imr-10.1177_0300060520986049.pdf [file sj-pdf-1-imr-10.1177_0300060520986049.pdf]

A

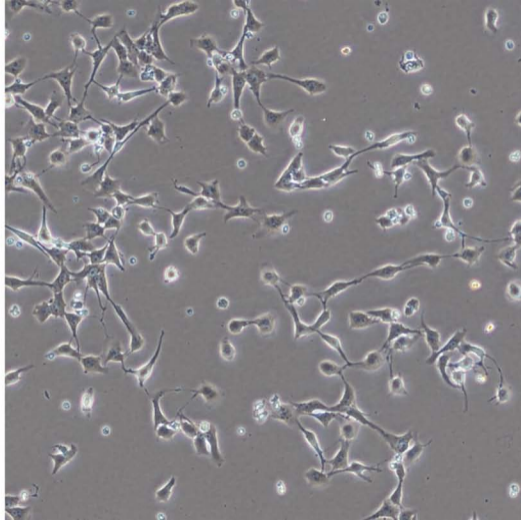

B

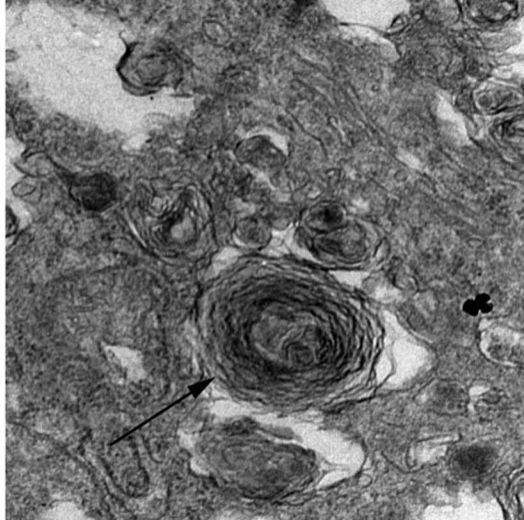

Supplement: sj-pdf-3-imr-10.1177_0300060520986049.pdf [file sj-pdf-3-imr-10.1177_0300060520986049.pdf]

## SAL-RNA1 expression

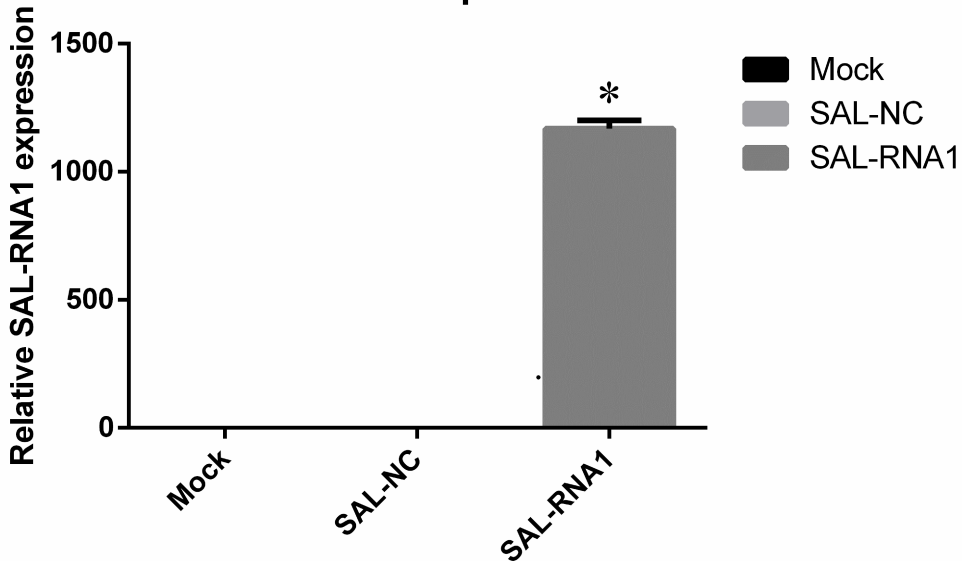

Supplement: sj-pdf-4-imr-10.1177_0300060520986049.pdf [file sj-pdf-4-imr-10.1177_0300060520986049.pdf]
